# Supplementary material for: Opioid use disorder in pregnancy: Leveraging provider perceptions to inform comprehensive treatment
Source: Research Square preprint supplement (doi:10.21203/rs.3.rs-24823/v3), 2021-01-20
Supplement: Supplementary file 1 [file 981ee295d1bc41fa91202e87.docx]

**Appendix A**

Questions for Providers

Title: Provider perceptions of Medication-Assisted Therapy among pregnant women with opioid use disorder

Objective**:** To understand health care provider experiences, perceptions, structural barriers and challenges with MAT delivery models and to explore strategies for improving the care of pregnant and postpartum women with OUD.

Thank you for agreeing to speak with us about MAT delivery to pregnant women.. The interview will take approximately 30-60 minutes and you may provide additional information at a later time, if needed. You can stop me to clarify questions or offer additional insights anytime during the interview.

| Topics | Questions  *Please respond to the following questions to help us understand your views about Medication-Assisted Treatment (MAT) delivery (30-60 minutes)* |
| --- | --- |
| Provider experience | Tell us what you do?  Number of years of experience?  How many years have you been treating patients with MAT |
| Provider experience and perceptions | 1. Describe your experience with patients receiving MAT during: (a) pregnancy; and, (b) postpartum.    1. What treatment protocols are in place for pregnant and postpartum patients?    2. Describe referral processes, if any.    3. Describe other providers involved in the referral process if any. 2. What is your perception of MAT delivery for pregnant women? 3. Would you say you are satisfied with the current MAT delivery model you have in place for pregnant women? 4. Describe any challenges and barriers you experienced in managing MAT treatment for, (a) Pregnant women; and (b) Postpartum women? 5. What do you perceive to be an effective strategy or thoughts for managing pregnant and postpartum women with MAT? |
| Access to treatment | 1. How would you describe your current treatment facility in relation to MAT delivery? Explain whether it is a traditionally set up or an integrated location. What would you define as an integrated model? 2. Are you concerned about your patients getting to treatment? (Motivation, etc.) 3. What follow-up steps are taken to assist pregnant and postpartum patients to continue MAT in your facility? (retention) 4. What barriers have you encountered that impeded treatment delivery? 5. What gets in the way of your patients getting to treatment (distance from home, transportation, time of day, length of appointment, reminder calls, friends, family, professionals or other)? 6. What would make it more likely for your patients to get to treatment? Rank according to importance. ( 1-5, most important) 7. How often would you say you referred a patient who did not follow through with the treatment plan? |
| Support services | 1. In addition to MAT treatment can you describe any other services, resources and support that are provided in your treatment facility? 2. Are you satisfied with the services, resources and support available to your patients?  If yes, identify the services you are satisfied with. If no, identify the services you are not satisfied with and state your reasons. 3. What other resources would you like to be available? 4. Which professional person (s) is most supportive and assists you in the treatment of your patients? |
| Patient characteristics | 1. Type of delivery model? Clinic-based, office-based, addiction center or other 2. Location? Rural, urban or suburban 3. Type of provider? 4. Number of years of experience? 5. Number of years’ experience with MAT 6. How would you describe the demographics of your patient population (including age, race, gender, socio-economic status (level of education, average household income, type of household, number of children in the household). 7. Do patients live close to the clinic or do they travel more than 30 minutes to get to the clinic? |
| Recommendations | 1. What are other recommendations or suggestions that you may have? |
